# Supplementary material for: All-in-One Self-Powered Human–Machine Interaction System for Wireless Remote Telemetry and Control of Intelligent Cars
Source: MDPI journal article supplement (doi:10.3390/nano11102711), 2021-10-14
Supplement: s1 [file s1]

# Supplementary Materials

## All-in-One Self-Powered Human–Machine Interaction System for Wireless Remote Telemetry and Control of Intelligent Cars

Tingting Zhang <sup>1,2</sup>, Lingjie Xie <sup>3</sup>, Junyan Li <sup>3</sup>, Zheguan Huang <sup>1,2</sup>, Hao Lei <sup>4</sup>, Yina Liu <sup>3</sup>, Zhen Wen <sup>4,\*</sup>, Yonglin Xie <sup>2,\*</sup> and Xuhui Sun <sup>4,\*</sup>

<sup>1</sup> School of Nano Technology and Nano Bionics, University of Science and Technology of China, Hefei 230026, China; ttzhang2017@sinano.ac.cn (T.Z.); zghuang2017@sinano.ac.cn (Z.H.)

<sup>2</sup> Inkjet Printing Technology Research Center, Printable Electronics Research Center, Suzhou Institute of Nano-Tech and Nano-Bionics, Chinese Academy of Sciences, Suzhou 215123, China

<sup>3</sup> School of Science, Xi'an Jiaotong-Liverpool University, Suzhou 215123, China; 20174214077@stu.suda.edu.cn (L.X.); 20124def10@gmail.com (J.L.); Yina.Liu@xjtlu.edu.cn (Y.L.)

<sup>4</sup> Jiangsu Key Laboratory for Carbon-Based Functional Materials and Devices, Institute of Functional Nano and Soft Materials (FUNSOM), Soochow University, Suzhou 215123, China; jacklei\_zjou@163.com

\* Correspondence: wenzhen2011@suda.edu.cn (Z.W.); ylxie2013@sinano.ac.cn (Y.X.); xhsun@suda.edu.cn (X.S.)

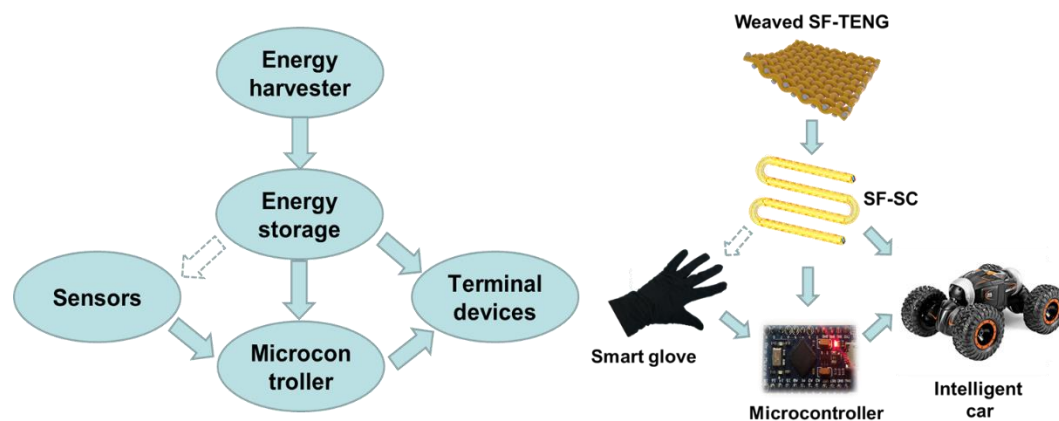

**Figure S1.** The working flow chart of an all-in-one self-powered human-machine interaction system.

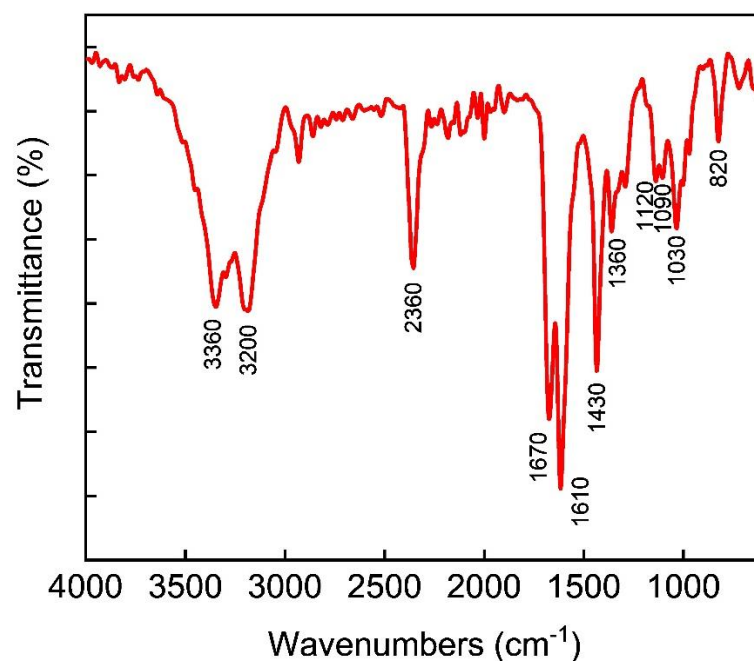

**Figure S2.** FTIR spectra of the freeze-dried composite hydrogel.

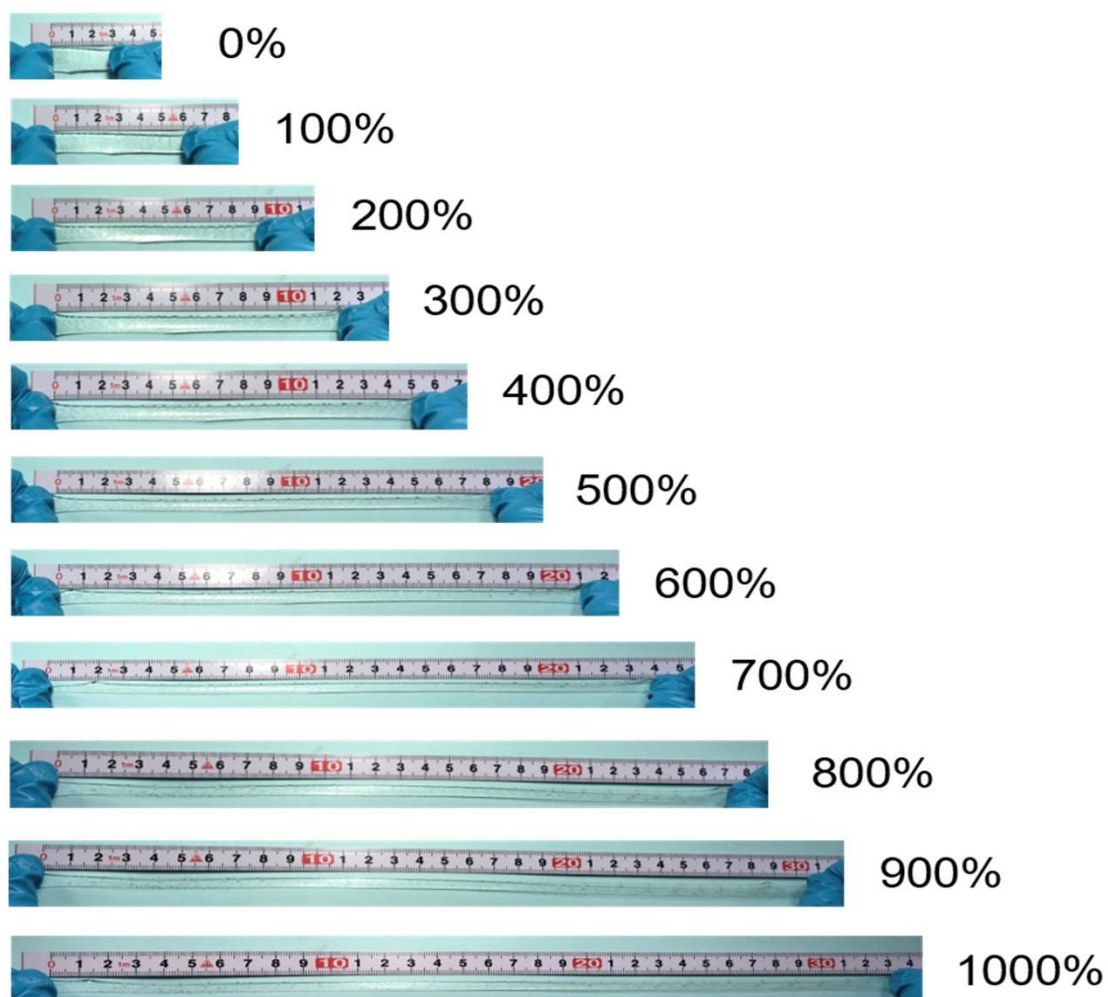

**Figure S3.** Optical images of hydrogel with different strains. The content of NaCl was fixed as 1.5g.

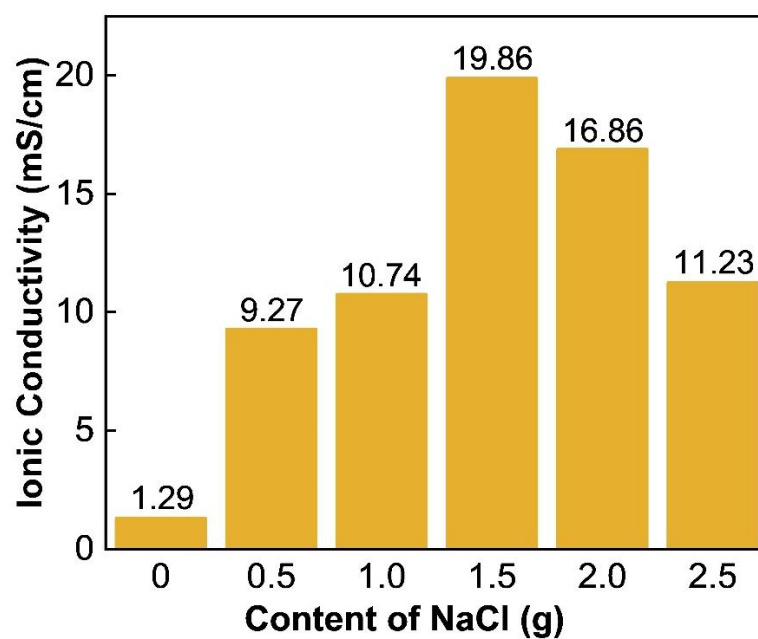

**Figure S4.** The calculated ionic conductivity( $\sigma$ ) of hydrogel with different NaCl contents. The maximal ionic conductivity is 19.86 mS/cm, which is 14 times higher than hydrogel without NaCl.

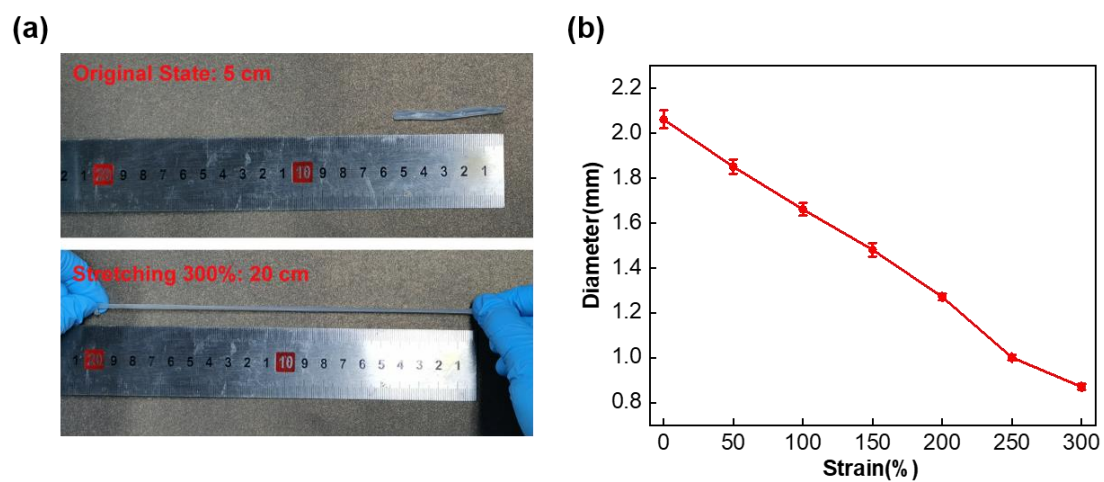

**Figure S5.** (a) Photos of SF-TENG at the original state and stretched state of 300% strain, (b) Diameter change at different stretch rates (0–300%).

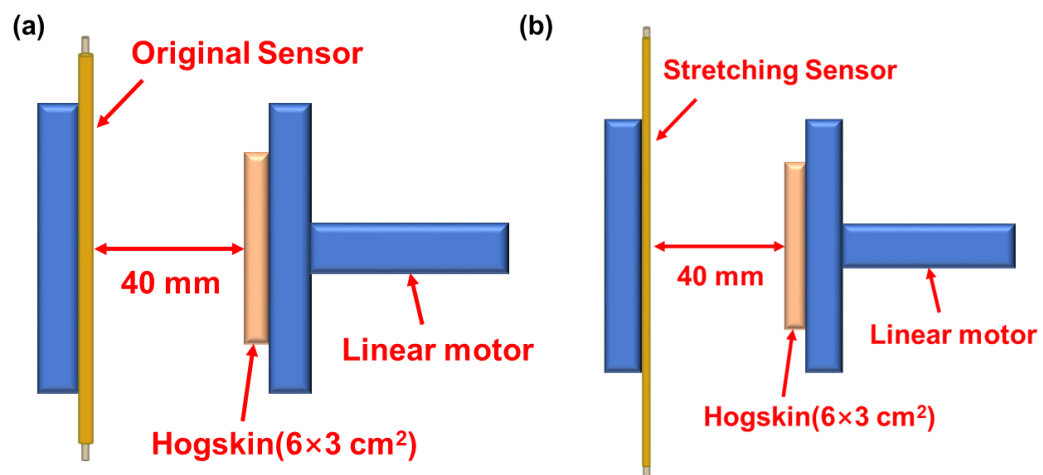

Figure S6. The testing schematic diagram of TENG at (a) original and (b) stretching state.

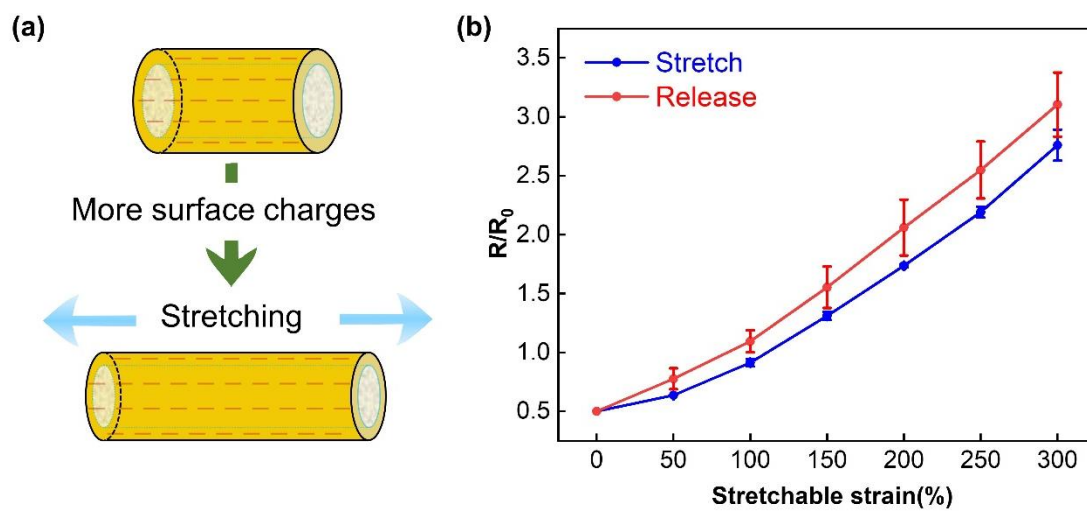

**Figure S7.** The surface of silicone rubber becomes thinner (a) and the resistance of hydrogel increase (b) during stretching.



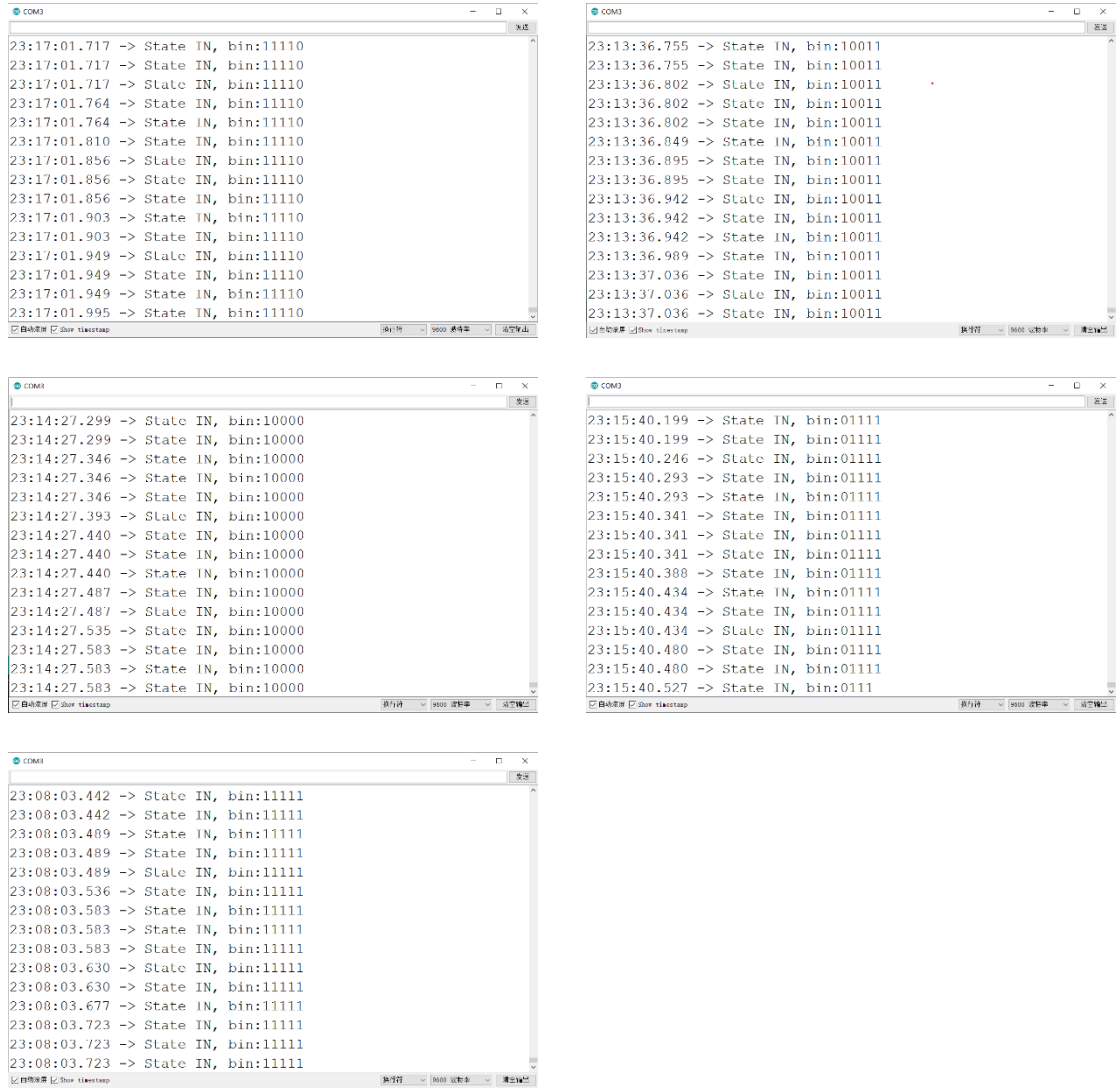

**Figure S8.** The processed and decoded RC command via a programmable mapping logic system.

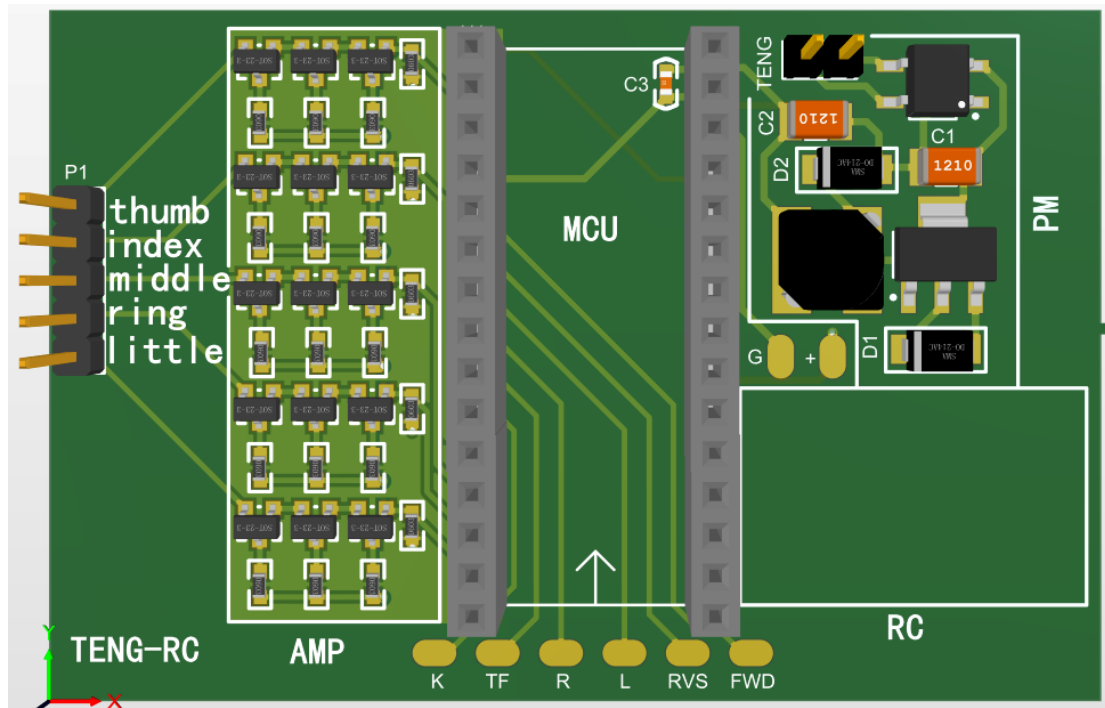

**Figure S9.** The circuit model for connecting the smart gloves and terminal devices.
